# Supplementary material
Source: PubMed Central journal article supplement (PMC3822951)
Supplement: jcmm0015-2399-SD1.pdf [file jcmm0015-2399-SD1.pdf]

**Supplementary Table 1.** Composition of the diets

|                          | <b>Standard diet</b>                  | <b>High Fat diet</b> |
|--------------------------|---------------------------------------|----------------------|
| Energy content (kcal/kg) | 2508                                  | 3701                 |
| Protein (g/kg)           | 200                                   | 170                  |
| Carbohydrate (g/kg)      | 720                                   | 670                  |
| Total fat (g/kg)         | 80                                    | 160                  |
|                          | <i><u>Saturated fatty acids</u></i>   |                      |
| Capric acid (g/kg)       | 0.0                                   | 4.7                  |
| Lauric acid (g/kg)       | 0.0                                   | 33.4                 |
| Myristic acid (g/kg)     | 0.1                                   | 15.7                 |
| Palmitic acid (g/kg)     | 5.2                                   | 28.3                 |
| Stearic acid (g/kg)      | 0.9                                   | 19.2                 |
| Arachidic acid (g/kg)    | 0.1                                   | 0.5                  |
|                          | <i><u>Unsaturated fatty acids</u></i> |                      |
| Palmitoleic acid (g/kg)  | 0.2                                   | 2.63                 |
| Oleic acid (g/kg)        | 5.1                                   | 29.0                 |
| Linoleic acid (g/kg)     | 15.1                                  | 11.2                 |
| Linolenic acid (g/kg)    | 3.2                                   | 2.5                  |
| Eicosaenoic acid (g/kg)  | 0.1                                   | 0.9                  |
| Arachidonic acid (g/kg)  | 0                                     | 0.4                  |

**Supplementary Table 2.** List of Antibodies

| <b>Primary Antibody</b>            | <b>Species</b> | <b>Dilution</b> | <b>Manufacturer</b>       | <b>Corresponding Secondary Antibody &amp; Dilution</b> |
|------------------------------------|----------------|-----------------|---------------------------|--------------------------------------------------------|
| Akt                                | Rabbit         | 1:1000          | Cell Signaling Technology | HRP anti-rabbit, 1:2500                                |
| Activin A receptor type 1 B (Alk4) | Rabbit         | 1:1000          | Abcam                     | HRP anti-rabbit, 1:2500                                |
| Calreticulin                       | Rabbit         | 1:1000          | Stressgen Bioreagents     | HRP anti-rabbit, 1:2500                                |
| GAPDH                              | Rabbit         | 1:10000         | Abcam                     | HRP anti-rabbit, 1:2500                                |
| Glut 4 (C-20)                      | Goat           | 1:1000          | Santa Cruz Technology     | HRP anti-goat, 1:2500                                  |
| p-Akt-Ser473                       | Rabbit         | 1:1000          | Cell Signaling Technology | HRP anti-rabbit, 1:2500                                |
| p-Phospholamban                    | Mouse          | 1:200           | Santa Cruz Technology     | HRP anti-mouse, 1:2500                                 |
| p-Smad-Ser465/467                  | Rabbit         | 1:500           | Cell Signaling Technology | HRP anti-rabbit, 1:2500                                |
| Serca2a                            | Mouse          | 1:1000          | Abcam                     | HRP anti-mouse, 1:2500                                 |
| SMAD2/3                            |                | 1:1000          | B&D Bioscience            | HRP anti-mouse, 1:2500                                 |
| $\alpha$ -Tubulin                  | Mouse          | 1:1000          | Calbiochem                | HRP anti-mouse, 1:2500                                 |

**Supplementary Table 3.** Immunoreactivity in conditioned medium collected from epicardial and subcutaneous adipose tissue explants from guinea pigs

| Swiss Prot | Name on array   | Symbol   | EAT (n=7)   | SAT (n=7)   |   |
|------------|-----------------|----------|-------------|-------------|---|
| Q15848     | Acrp30          | ADIPOQ   | 182 ± 42    | 519 ± 166   | * |
| P08476     | Activin A       | INHBA    | 1718 ± 468  | 536 ± 212   | * |
| O00253     | AgRP            | AGRP     | 1434 ± 521  | 1076 ± 141  |   |
| Q13740     | ALCAM           | ALCAM    | 8149 ± 6594 | 1286 ± 621  |   |
| P15514     | Amphiregulin    | AREG     | 1998 ± 568  | 1629 ± 557  |   |
| P03950     | Angiogenin      | ANG      | 208 ± 68    | 193 ± 64    |   |
| O15123     | Angiopoietin-2  | ANGPT2   | 2576 ± 754  | 1805 ± 342  |   |
| P30530     | Axl             | AXL      | 712 ± 220   | 258 ± 65    |   |
| P33681     | B7-1 (CD80)     | CD80     | 496 ± 119   | 438 ± 83    |   |
| P23560     | BDNF            | BDNF     | 820 ± 222   | 829 ± 144   |   |
| P09038     | bFGF            | FGF2     | 1328 ± 617  | 1359 ± 498  |   |
| O43927     | BLC             | CXCL13   | 388 ± 85    | 268 ± 74    |   |
| P12644     | BMP-4           | BMP4     | 719 ± 253   | 919 ± 227   |   |
| P22003     | BMP-5           | BMP5     | 1090 ± 342  | 958 ± 300   |   |
| P22004     | BMP-6           | BMP6     | 1087 ± 305  | 1310 ± 297  |   |
| P18075     | BMP-7           | BMP7     | 358 ± 73    | 245 ± 80    |   |
| P01138     | b-NGF           | NGF      | 4372 ± 1794 | 2995 ± 723  |   |
| P35070     | BTC             | BTC      | 1037 ± 330  | 649 ± 127   |   |
| Q16619     | Cardiotrophin-1 | CTF1     | 941 ± 289   | 400 ± 88    | * |
| Q9NRJ3     | CCL-28          | CCL28    | 307 ± 128   | 290 ± 72    |   |
| P08571     | CD14            | CD14     | 371 ± 80    | 270 ± 58    |   |
| P55773     | CK b 8-1        | CCL23    | 1059 ± 401  | 1031 ± 246  |   |
| P26441     | CNTF            | CNTF     | 459 ± 79    | 513 ± 61    |   |
| Q9Y4X3     | CTACK           | CCL27    | 626 ± 110   | 767 ± 314   |   |
| Q9H2A7     | CXCL-16         | CXCL16   | 1252 ± 268  | 943 ± 222   |   |
| O75509     | DR6 (TNFRSF21)  | TNFRSF21 | 559 ± 224   | 440 ± 138   |   |
| Q06418     | Dtk             | TYRO3    | 637 ± 157   | 574 ± 179   |   |
| P01133     | EGF             | EGF      | 730 ± 162   | 876 ± 235   |   |
| P00533     | EGF-R           | EGFR     | 347 ± 113   | 445 ± 176   |   |
| P42830     | ENA-78          | CXCL5    | 966 ± 445   | 969 ± 313   |   |
| P17813     | Endoglin        | ENG      | 515 ± 101   | 326 ± 77    | * |
| P51671     | Eotaxin         | CCL11    | 570 ± 144   | 532 ± 138   |   |
| O00175     | Eotaxin-2       | CCL24    | 875 ± 264   | 1046 ± 295  |   |
| Q9Y258     | Eotaxin-3       | CCL26    | 670 ± 211   | 551 ± 146   |   |
| P21860     | ErbB3           | ERBB3    | 834 ± 170   | 500 ± 88    |   |
| P16581     | E-Selectin      | SELE     | 440 ± 100   | 308 ± 85    | * |
| P48023     | Fas Ligand      | FASLG    | 843 ± 146   | 621 ± 143   |   |
| Q549F0     | Fas/TNFRSF6     | FAF1     | 2641 ± 1082 | 2142 ± 856  |   |
| P08620     | FGF-4           | FGF4     | 3175 ± 1002 | 3931 ± 1427 |   |
| P10767     | FGF-6           | FGF6     | 283 ± 46    | 299 ± 95    |   |
| P21781     | FGF-7           | FGF7     | 273 ± 48    | 282 ± 65    |   |
| P31371     | FGF-9           | FGF9     | 846 ± 296   | 736 ± 151   |   |
| P49771     | Fit-3 Ligand    | FLT3LG   | 601 ± 313   | 555 ± 242   |   |
| P78423     | Fractalkine     | CX3CL1   | 302 ± 68    | 295 ± 63    |   |

|        |                    |          |              |              |
|--------|--------------------|----------|--------------|--------------|
| P80162 | GCP-2              | CXCL6    | 339 ± 60     | 415 ± 79     |
| P09919 | GCSF               | CSF3     | 513 ± 208    | 474 ± 246    |
| P39905 | GDNF               | GDNF     | 3799 ± 2962  | 2904 ± 1646  |
| Q9Y5U5 | GITR               | TNFRSF18 | 672 ± 185    | 2198 ± 1605  |
| Q9UNG2 | GITR-Ligand        | TNFSF18  | 596 ± 241    | 692 ± 466    |
| P04141 | GM-CSF             | CSF2     | 196 ± 72     | 206 ± 44     |
| P09341 | GRO                | CXCL1    | 699 ± 122    | 549 ± 94     |
| P09341 | GRO $\alpha$       | CXCL1    | 217 ± 51     | 286 ± 107    |
| O15467 | HCC-4              | CCL16    | 693 ± 206    | 765 ± 423    |
| P14210 | HGF                | HGF      | 254 ± 64     | 215 ± 63     |
| P22362 | I-309              | CCL1     | 292 ± 97     | 456 ± 110    |
| P05362 | ICAM-1             | ICAM1    | 521 ± 134    | 493 ± 108    |
| P13598 | ICAM-2             | ICAM2    | 15372 ± 5139 | 13015 ± 3916 |
| P32942 | ICAM-3             | ICAM3    | 703 ± 474    | 281 ± 136    |
| P01343 | IGF-1              | IGF1     | 443 ± 145    | 282 ± 49     |
| P08833 | IGFBP-1            | IGFBP1   | 531 ± 147    | 590 ± 136    |
| P18065 | IGFBP-2            | IGFBP2   | 348 ± 78     | 403 ± 85     |
| P17936 | IGFBP-3            | IGFBP3   | 794 ± 240    | 952 ± 579    |
| P22692 | IGFBP-4            | IGFBP4   | 582 ± 287    | 342 ± 145    |
| P24592 | IGFBP-6            | IGFBP6   | 1070 ± 314   | 951 ± 246    |
| P08069 | IGF-I SR           | IGF1R    | 290 ± 117    | 326 ± 93     |
| P01344 | IGF-II             | IGF2     | 5358 ± 3475  | 537 ± 156    |
| P27930 | IL-1 R II          | IL1R2    | 4512 ± 3582  | 2587 ± 1867  |
| Q01638 | IL-1 RA/ST2        | IL1RL1   | 683 ± 154    | 711 ± 270    |
| P14778 | IL-1 RI            | IL1R1    | 362 ± 114    | 337 ± 64     |
| P22301 | IL-10              | IL10     | 489 ± 57     | 404 ± 138    |
| Q08334 | IL-10 R $\beta$    | IL10RB   | 352 ± 56     | 234 ± 115    |
| P20809 | IL-11              | IL11     | 280 ± 151    | 443 ± 243    |
| P29459 | IL-12 p40          | IL12A    | 893 ± 344    | 798 ± 211    |
| P29460 | IL-12 p70          | IL12B    | 695 ± 213    | 708 ± 431    |
| P35225 | IL-13              | IL13     | 326 ± 105    | 204 ± 78     |
| Q14627 | IL-13 R $\alpha$ 2 | IL13RA2  | 847 ± 340    | 402 ± 132    |
| P40933 | IL-15              | IL15     | 234 ± 61     | 223 ± 57     |
| Q14005 | IL-16              | IL16     | 426 ± 78     | 382 ± 97     |
| Q16552 | IL-17              | IL17A    | 422 ± 234    | 551 ± 354    |
| Q13478 | IL-18 BPa          | IL18R1   | 224 ± 47     | 157 ± 37     |
| O95256 | IL-18 R $\beta$    | IL18RAP  | 802 ± 203    | 486 ± 90     |
| P01583 | IL-1a              | IL1A     | 670 ± 183    | 970 ± 215    |
| P01584 | IL-1b              | IL1B     | 192 ± 64     | 280 ± 60     |
| P18510 | IL-1ra             | IL1RN    | 191 ± 41     | 325 ± 75     |
| P60568 | IL-2               | IL2      | 114 ± 34     | 133 ± 20     |
| P31785 | IL-2 R $\gamma$    | IL2RG    | 606 ± 102    | 429 ± 123    |
| P01589 | IL-2 R $\alpha$    | IL2RA    | 493 ± 109    | 263 ± 38     |
| P14784 | IL-2 R $\beta$     | IL2RB    | 715 ± 300    | 838 ± 482    |
| Q9HBE5 | IL-21R             | IL21R    | 614 ± 161    | 311 ± 54     |
| P08700 | IL-3               | IL3      | 178 ± 82     | 281 ± 58     |
| P05112 | IL-4               | IL4      | 264 ± 132    | 380 ± 186    |
| P05113 | IL-5               | IL5      | 201 ± 43     | 128 ± 38     |

\*

|        |                 |           |                 |                 |   |
|--------|-----------------|-----------|-----------------|-----------------|---|
| Q01344 | IL-5 R $\alpha$ | IL5RA     | 514 $\pm$ 133   | 137 $\pm$ 52    | * |
| P05231 | IL-6            | IL6       | 519 $\pm$ 192   | 264 $\pm$ 96    |   |
| P08887 | IL-6R           | IL6R      | 1185 $\pm$ 311  | 1324 $\pm$ 214  |   |
| P13232 | IL-7            | IL7       | 150 $\pm$ 19    | 214 $\pm$ 81    |   |
| P10145 | IL-8            | IL8       | 420 $\pm$ 131   | 406 $\pm$ 209   |   |
| P15248 | IL-9            | IL9       | 831 $\pm$ 202   | 742 $\pm$ 188   |   |
| P01579 | INF $\gamma$    | IFNG      | 168 $\pm$ 28    | 270 $\pm$ 47    |   |
| P02778 | IP-10           | CXCL10    | 990 $\pm$ 396   | 451 $\pm$ 123   |   |
| O14625 | I-TAC           | CXCL11    | 507 $\pm$ 138   | 593 $\pm$ 133   |   |
| P17676 | LAP             | CEBPB     | 693 $\pm$ 229   | 297 $\pm$ 98    |   |
| P41159 | Leptin          | LEP       | 491 $\pm$ 135   | 501 $\pm$ 89    |   |
| P48357 | Leptin R        | LEPR      | 838 $\pm$ 196   | 713 $\pm$ 167   |   |
| P15018 | LIF             | LIF       | 646 $\pm$ 117   | 574 $\pm$ 159   |   |
| O43557 | LIGHT           | TNFSF14   | 682 $\pm$ 194   | 710 $\pm$ 183   |   |
| P14151 | L-Selectin      | SELL      | 511 $\pm$ 115   | 382 $\pm$ 139   |   |
| P47992 | Lymphotactin    | XCL1      | 1019 $\pm$ 287  | 1406 $\pm$ 476  |   |
| P13500 | MCP-1           | CCL2      | 304 $\pm$ 109   | 319 $\pm$ 64    |   |
| P80075 | MCP-2           | CCL8      | 454 $\pm$ 170   | 354 $\pm$ 73    |   |
| P80098 | MCP-3           | CCL7      | 218 $\pm$ 109   | 290 $\pm$ 74    |   |
| Q99616 | MCP-4           | CCL13     | 562 $\pm$ 364   | 185 $\pm$ 44    |   |
| P09603 | M-CSF           | CSF1      | 498 $\pm$ 161   | 807 $\pm$ 191   |   |
| P07333 | M-CSF R         | CSF1R     | 376 $\pm$ 113   | 165 $\pm$ 52    |   |
| O00626 | MDC             | CCL22     | 629 $\pm$ 105   | 890 $\pm$ 224   |   |
| P14174 | MIF             | MIF       | 2203 $\pm$ 491  | 2891 $\pm$ 1565 |   |
| Q07325 | MIG             | CXCL9     | 379 $\pm$ 148   | 347 $\pm$ 112   |   |
| P10147 | MIP-1a          | CCL3      | 1017 $\pm$ 359  | 921 $\pm$ 115   |   |
| P13236 | MIP-1b          | CCL4      | 1172 $\pm$ 283  | 1320 $\pm$ 539  |   |
| Q16663 | MIP-1d          | CCL15     | 852 $\pm$ 468   | 738 $\pm$ 199   |   |
| P78556 | MIP-3a          | CCL20     | 237 $\pm$ 85    | 281 $\pm$ 90    |   |
| Q99731 | MIP-3b          | CCL19     | 229 $\pm$ 41    | 330 $\pm$ 62    |   |
| P03956 | MMP-1           | MMP1      | 1355 $\pm$ 171  | 1194 $\pm$ 276  |   |
| P45452 | MMP-13          | MMP13     | 405 $\pm$ 96    | 207 $\pm$ 76    |   |
| P08254 | MMP-3           | MMP3      | 478 $\pm$ 116   | 314 $\pm$ 73    |   |
| P14780 | MMP-9           | MMP9      | 406 $\pm$ 179   | 228 $\pm$ 63    |   |
| P55773 | MPIF-1          | CCL23     | 262 $\pm$ 70    | 170 $\pm$ 35    |   |
| P26927 | MSPa            | MST1      | 559 $\pm$ 140   | 431 $\pm$ 131   |   |
| P02775 | NAP-2           | PPBP      | 3162 $\pm$ 1314 | 4162 $\pm$ 1257 |   |
| P08138 | NGF R           | NGFR      | 272 $\pm$ 72    | 240 $\pm$ 20    |   |
| P20783 | NT-3            | NTF3      | 594 $\pm$ 239   | 721 $\pm$ 182   |   |
| P34130 | NT-4            | NTF4      | 617 $\pm$ 122   | 485 $\pm$ 116   |   |
| P13725 | Oncostatin      | OSM       | 575 $\pm$ 120   | 537 $\pm$ 91    |   |
| O00300 | Osteoprotegerin | TNFRSF11B | 552 $\pm$ 192   | 496 $\pm$ 119   |   |
| P55774 | PARC            | CCL18     | 858 $\pm$ 362   | 1571 $\pm$ 322  |   |
| P04085 | PDGF AA         | PDGFA     | 897 $\pm$ 142   | 453 $\pm$ 149   | * |
| P16234 | PDGF R $\alpha$ | PDGFRA    | 395 $\pm$ 120   | 168 $\pm$ 44    | * |
| P09619 | PDGF R $\beta$  | PDGFRB    | 386 $\pm$ 86    | 563 $\pm$ 182   |   |
| na     | PDGF-AB         |           | 661 $\pm$ 98    | 489 $\pm$ 77    |   |
| P01127 | PDGF-BB         | PDGFB     | 479 $\pm$ 119   | 505 $\pm$ 118   |   |

|        |                |           |               |               |   |
|--------|----------------|-----------|---------------|---------------|---|
| P16284 | PECAM-1        | PECAM1    | 278 ± 36      | 168 ± 48      | * |
| Q07326 | PIGF           | PIGF      | 982 ± 290     | 1058 ± 286    |   |
| P01236 | Prolactin      | PRL       | 554 ± 151     | 302 ± 85      |   |
| P13501 | RANTES         | CCL5      | 2158 ± 472    | 2727 ± 885    |   |
| P21583 | SCF            | KITLG     | 563 ± 117     | 391 ± 93      |   |
| P10721 | SCF R          | KIT       | 679 ± 137     | 554 ± 87      |   |
| P48061 | SDF-1          | CXCL12    | 470 ± 316     | 474 ± 207     |   |
| P48061 | SDF-1β         | CXCL12    | 389 ± 105     | 158 ± 45      |   |
| P40189 | sgp 130        | IL6ST     | 1782 ± 526    | 1324 ± 370    |   |
| O15389 | Siglec-5       | SIGLEC5   | 406 ± 106     | 196 ± 54      |   |
| P19438 | sTNFR I        | TNFRSF1A  | 2271 ± 1064   | 2308 ± 1287   |   |
| P20333 | sTNFR II       | TNFRSF1B  | 1194 ± 430    | 792 ± 288     |   |
| Q92583 | TARC           | CCL17     | 359 ± 78      | 323 ± 36      |   |
| O15444 | TECK           | CCL25     | 746 ± 203     | 498 ± 149     |   |
| P01135 | TGFα           | TGFA      | 728 ± 224     | 615 ± 222     |   |
| P01137 | TGFβ1          | TGFB1     | 916 ± 731     | 594 ± 397     |   |
| P61812 | TGFβ2          | TGFB2     | 1264 ± 328    | 1461 ± 364    |   |
| P10600 | TGFβ3          | TGFB3     | 398 ± 98      | 274 ± 31      |   |
| P40225 | Thrombopoietin | THPO      | 729 ± 151     | 498 ± 85      |   |
| P35590 | Tie-1          | TIE1      | 516 ± 122     | 488 ± 119     |   |
| Q02763 | Tie-2          | TEK       | 734 ± 187     | 381 ± 90      |   |
| P01033 | TIMP-1         | TIMP1     | 882 ± 408     | 958 ± 553     |   |
| P16035 | TIMP-2         | TIMP2     | 47654 ± 16491 | 35681 ± 92975 |   |
| Q99727 | TIMP-4         | TIMP4     | 3368 ± 1237   | 5444 ± 3623   |   |
| P01375 | TNFα           | TNF       | 248 ± 69      | 251 ± 66      |   |
| P01374 | TNFβ           | LTA       | 814 ± 285     | 770 ± 179     |   |
| O14798 | TRAIL R3       | TNFRSF10C | 361 ± 77      | 299 ± 87      |   |
| Q9UBN6 | TRAIL R4       | TNFRSF10D | 628 ± 121     | 526 ± 86      |   |
| Q03405 | uPAR           | PLAUR     | 450 ± 148     | 416 ± 102     |   |
| P33151 | VE-Cadherin    | CDH5      | 437 ± 104     | 348 ± 111     |   |
| P15692 | VEGF           | VEGFA     | 727 ± 208     | 1092 ± 723    |   |
| P35968 | VEGF R2        | KDR       | 536 ± 96      | 230 ± 54      | * |
| P35916 | VEGF R3        | FLT4      | 4452 ± 1326   | 3822 ± 1781   |   |
| O43915 | VEGF-D         | FIGF      | 2536 ± 1190   | 2702 ± 1816   |   |

\*,  $P < 0.05$  epicardial adipose tissue (EAT) versus subcutaneous adipose tissue (SAT)

**A**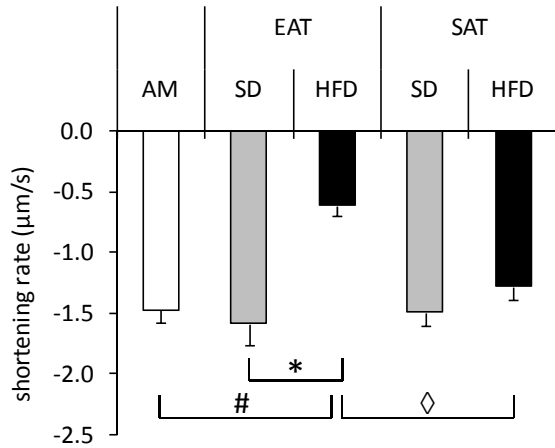**B**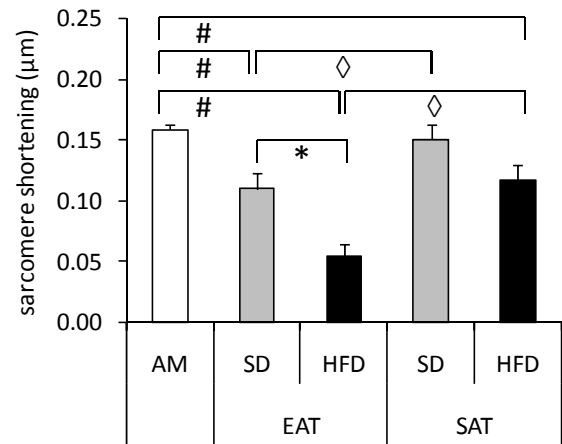**C**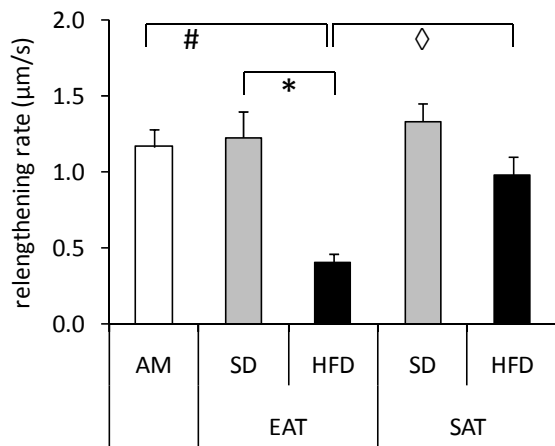

**Supplementary Figure 1. Effect of conditioned medium from epicardial and subcutaneous adipose tissue on sarcomere shortening in cardiomyocytes.** Primary adult rat cardiomyocytes were incubated with control AM or CM (diluted 1:2) from EAT and SAT from SD- and HFD-fed guinea pigs for 30 min before analysis of contractile function. **A-C.** Effect of exposure of cardiomyocytes to CM on departure velocity of contraction (**A**), peak sarcomere shortening (**B**), and return velocity of contraction (**C**). Open bars, AM; gray bars, CM from SD-fed animals; black bars, CM from HFD-fed animals. Data are expressed as mean  $\pm$  S.E.M. of at least 8 independent experiments. Differences between the experimental groups were calculated by one-way ANOVA and unpaired students t-tests. #,  $P < 0.05$  versus AM; \*,  $P < 0.05$ , HFD versus SD; ◇,  $P < 0.05$  EAT versus SAT.

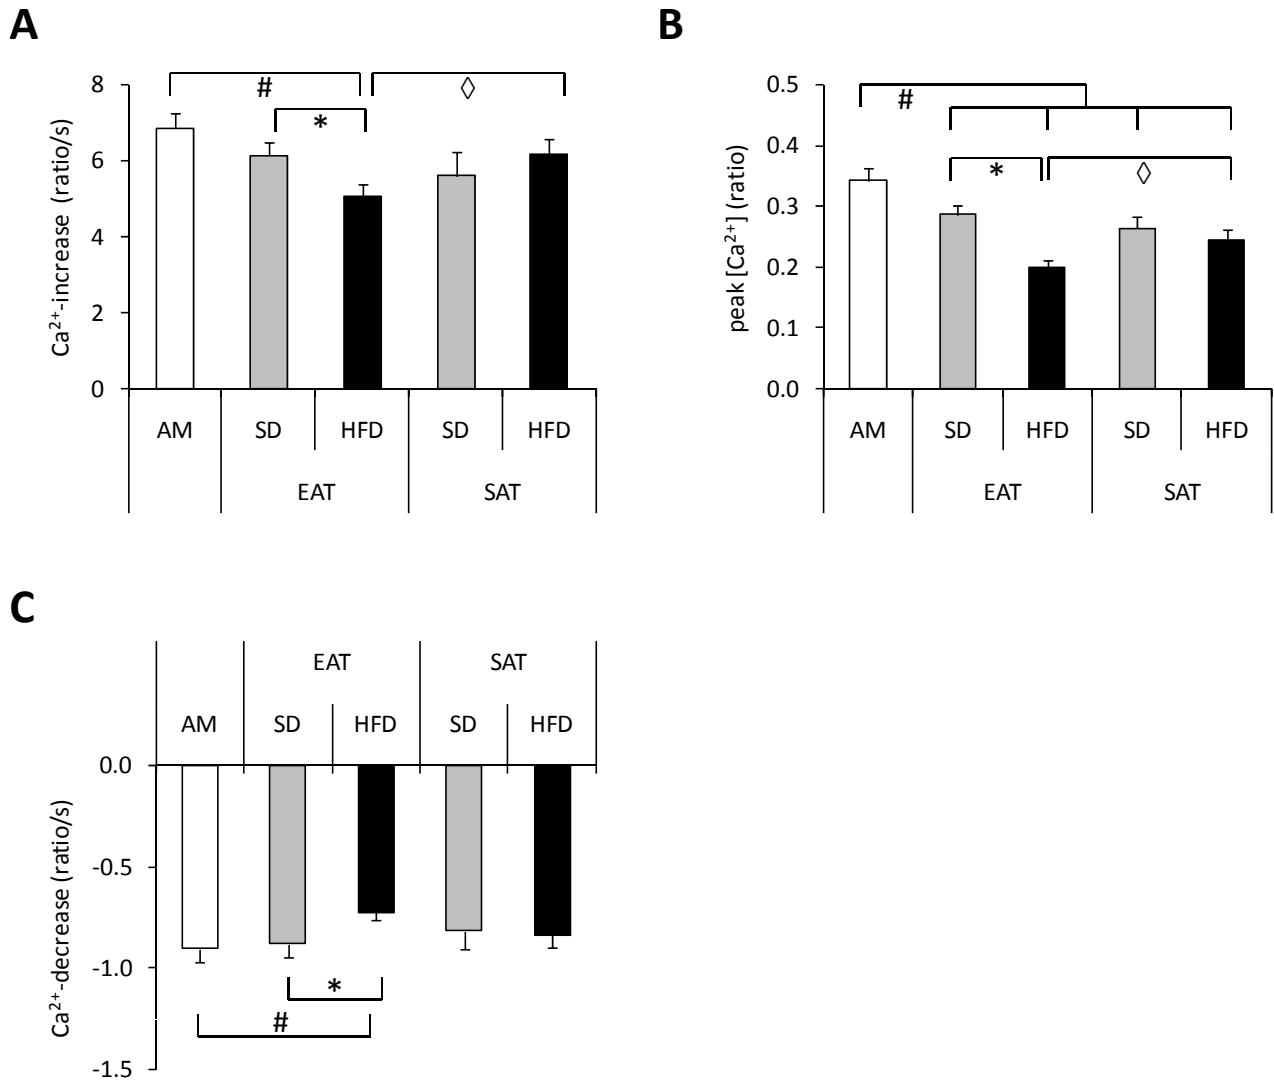

**Supplementary Figure 2. Effect of conditioned medium from epicardial and subcutaneous adipose tissue on cytosolic [Ca<sup>2+</sup>] in cardiomyocytes.** Primary adult rat cardiomyocytes were incubated with control AM or CM (diluted 1:2) from EAT and SAT from SD- and HFD-fed guinea pigs for 30 min before analysis of cytosolic [Ca<sup>2+</sup>]. **A-C.** Effect of exposure of cardiomyocytes to CM on [Ca<sup>2+</sup>] increase (**A**), peak [Ca<sup>2+</sup>] (**B**), and [Ca<sup>2+</sup>] decrease (**C**). Open bars, AM; gray bars, CM from SD-fed animals; black bars, CM from HFD-fed animals. Data are expressed as mean  $\pm$  S.E.M. of at least 8 independent experiments. Differences between the experimental groups were calculated by one-way ANOVA and unpaired students t-tests. #,  $P < 0.05$  versus AM; \*,  $P < 0.05$ , HFD versus SD;  $\diamond$ ,  $P < 0.05$  EAT versus SAT.



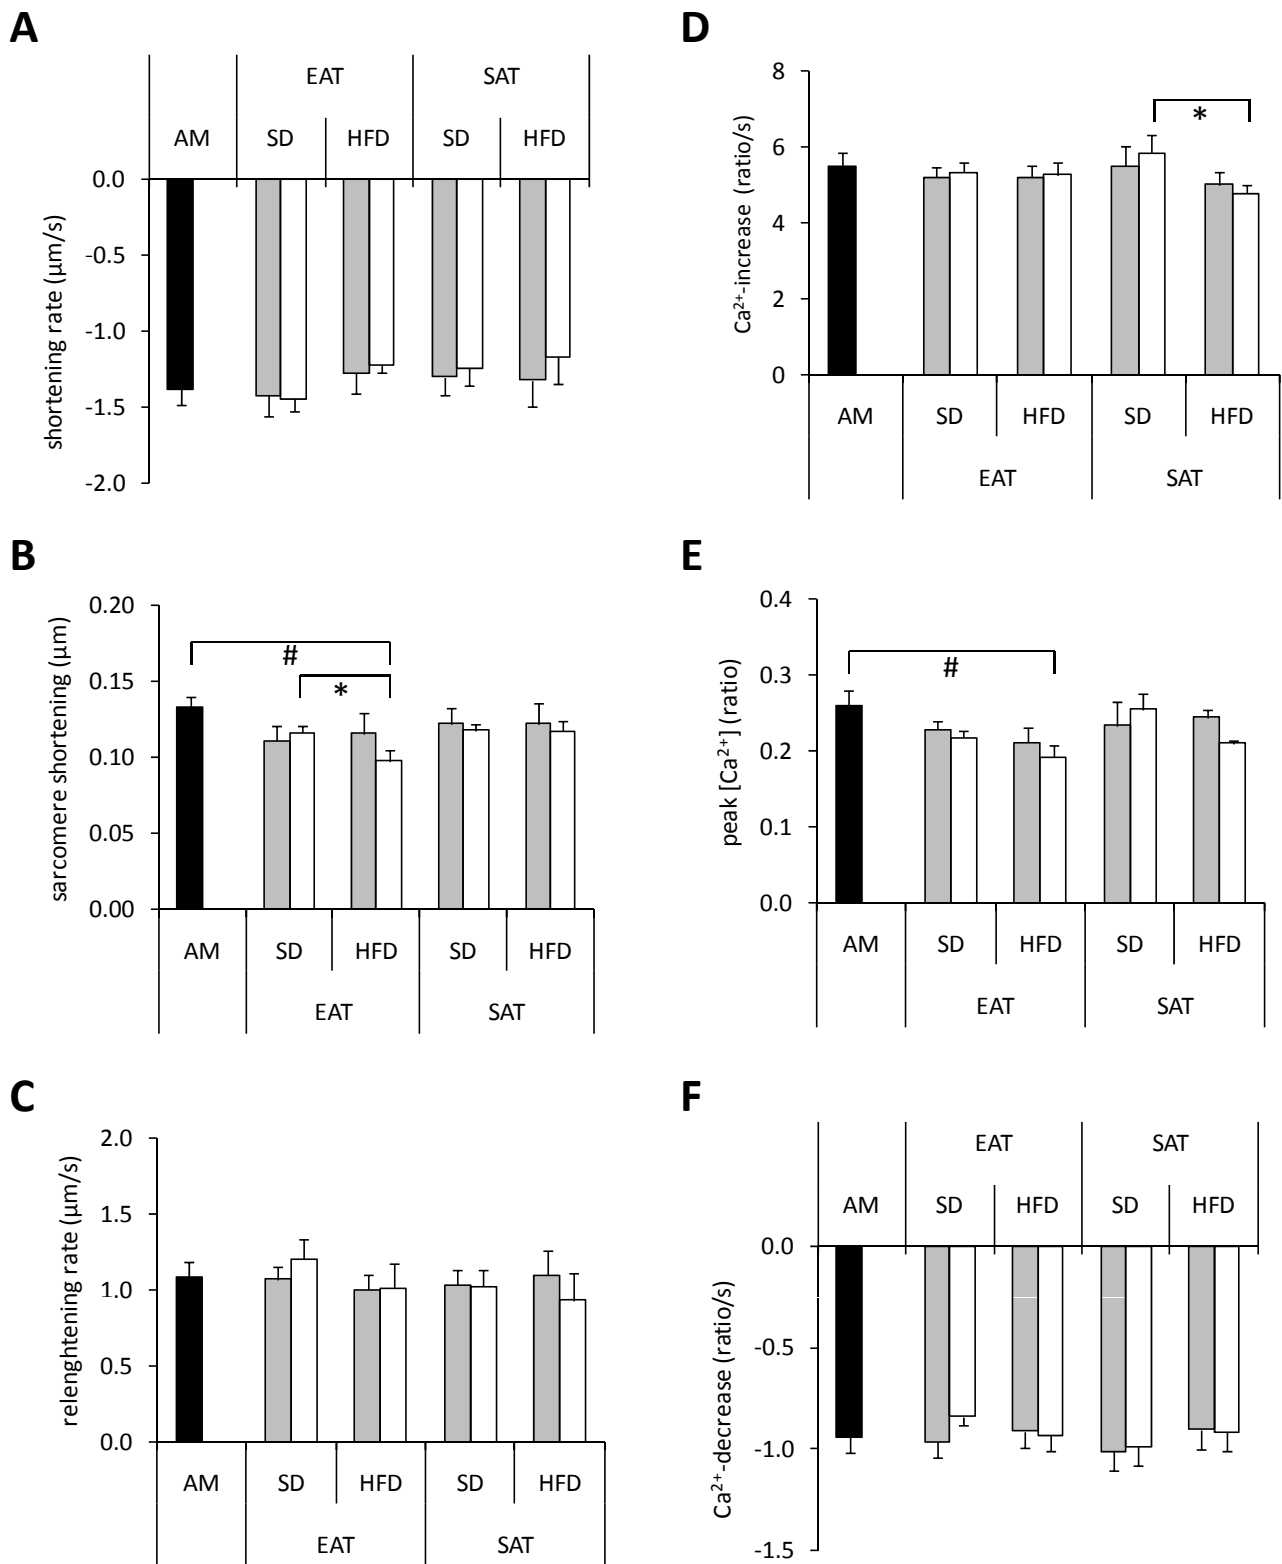

**Supplementary Figure 3. Contractile function in cardiomyocytes 2 hours after removal of conditioned media.** Primary adult rat cardiomyocytes were incubated with control AM or CM from EAT and SAT from SD- and HFD-fed guinea pigs for 30 min. Then, the CM were replaced by control AM. Following a 2 h incubation, contractile function and cytosolic  $[\text{Ca}^{2+}]$  was analyzed. **A-C.** Reversibility effect of exposure of cardiomyocytes to CM on departure velocity of contraction (**A**), peak sarcomere shortening (**B**), and return velocity of contraction (**C**). **D-F.** Reversibility effect of exposure of cardiomyocytes to CM on  $[\text{Ca}^{2+}]$  increase (**D**), peak  $[\text{Ca}^{2+}]$  (**E**), and  $[\text{Ca}^{2+}]$  decrease (**F**). Black bars, AM; gray bars, cells exposed to CM diluted 1:4; open bars, cells exposed to CM diluted 1:4. Data are mean  $\pm$  S.E.M. from at least 8 independent experiments. Groups were compared by one-way ANOVA and unpaired students t-test. #,  $P < 0.05$  versus AM; \*,  $P < 0.05$ , HFD versus SD.
